# Supplementary material for: A multidimensional education program at substance dependence treatment centers improves patient knowledge and hepatitis C care
Source: PubMed Central journal article supplement (PMC5062838; doi:10.1186/s12879-016-1883-6), 2016-10-12
Supplement: 12879_2016_1883_MOESM1_ESM.pdf [file 12879_2016_1883_MOESM1_ESM.pdf]

## STUDY QUESTIONNAIRE

| ELIGIBILITY AND DEMOGRAPHICS                                                                 |                                                                                                                                                                                                                                                                                                                                                                                                                                                                                                                                                                                                                                                                                                                                                                               |
|----------------------------------------------------------------------------------------------|-------------------------------------------------------------------------------------------------------------------------------------------------------------------------------------------------------------------------------------------------------------------------------------------------------------------------------------------------------------------------------------------------------------------------------------------------------------------------------------------------------------------------------------------------------------------------------------------------------------------------------------------------------------------------------------------------------------------------------------------------------------------------------|
| 1.1. Visit date                                                                              | _ _ _ _ - _ _ - _ _  (yyyy-mm-dd)                                                                                                                                                                                                                                                                                                                                                                                                                                                                                                                                                                                                                                                                                                                                             |
| 1.2. Informed consent date                                                                   | _ _ _ _ - _ _ - _ _  (yyyy-mm-dd)                                                                                                                                                                                                                                                                                                                                                                                                                                                                                                                                                                                                                                                                                                                                             |
| 2. Eligibility – inclusion criteria                                                          |                                                                                                                                                                                                                                                                                                                                                                                                                                                                                                                                                                                                                                                                                                                                                                               |
| 2.1. Age 18 years                                                                            | <input type="checkbox"/> Yes <input type="checkbox"/> No                                                                                                                                                                                                                                                                                                                                                                                                                                                                                                                                                                                                                                                                                                                      |
| 2.2. Patient with HCV infection with an appointment at the STDC during the evaluation period | <input type="checkbox"/> Yes <input type="checkbox"/> No                                                                                                                                                                                                                                                                                                                                                                                                                                                                                                                                                                                                                                                                                                                      |
| 2.3. Patient provide Informed Consent                                                        | <input type="checkbox"/> Yes <input type="checkbox"/> No                                                                                                                                                                                                                                                                                                                                                                                                                                                                                                                                                                                                                                                                                                                      |
| 3. Eligibility – inclusion criteria                                                          |                                                                                                                                                                                                                                                                                                                                                                                                                                                                                                                                                                                                                                                                                                                                                                               |
| 3.1. Patients without confirmed diagnosis of HCV infection, registered in the STDC           | <input type="checkbox"/> Yes <input type="checkbox"/> No                                                                                                                                                                                                                                                                                                                                                                                                                                                                                                                                                                                                                                                                                                                      |
| 4. Demographic Data                                                                          |                                                                                                                                                                                                                                                                                                                                                                                                                                                                                                                                                                                                                                                                                                                                                                               |
| 4.1. Date of Birth (year and month)                                                          | _ _ _ _ - _ _  (yyyy-mm)                                                                                                                                                                                                                                                                                                                                                                                                                                                                                                                                                                                                                                                                                                                                                      |
| 4.2. Sex                                                                                     | <input type="checkbox"/> Male <input type="checkbox"/> Female                                                                                                                                                                                                                                                                                                                                                                                                                                                                                                                                                                                                                                                                                                                 |
| 4.3. Educational level                                                                       | <input type="checkbox"/> No educational level<br><input type="checkbox"/> 1 <sup>st</sup> year <input type="checkbox"/> 10 <sup>th</sup> year<br><input type="checkbox"/> 2 <sup>nd</sup> year <input type="checkbox"/> 11 <sup>th</sup> year<br><input type="checkbox"/> 3 <sup>rd</sup> year <input type="checkbox"/> 12 <sup>th</sup> year<br><input type="checkbox"/> 4 <sup>th</sup> year <input type="checkbox"/> BSc<br><input type="checkbox"/> 5 <sup>th</sup> year <input type="checkbox"/> Degree<br><input type="checkbox"/> 6 <sup>th</sup> year <input type="checkbox"/> Master<br><input type="checkbox"/> 7 <sup>th</sup> year <input type="checkbox"/> Phd<br><input type="checkbox"/> 8 <sup>th</sup> year<br><input type="checkbox"/> 9 <sup>th</sup> year |
| 4.4. Marital status                                                                          | <input type="checkbox"/> Single<br><input type="checkbox"/> Married<br><input type="checkbox"/> Divorced<br><input type="checkbox"/> Widow                                                                                                                                                                                                                                                                                                                                                                                                                                                                                                                                                                                                                                    |
| 4.5. Professional status                                                                     | <input type="checkbox"/> Student<br><input type="checkbox"/> Unemployed<br><input type="checkbox"/> Employed, profession: _____<br><input type="checkbox"/> Retired, profession: _____<br><input type="checkbox"/> Other, specify: _____                                                                                                                                                                                                                                                                                                                                                                                                                                                                                                                                      |
| CLINICAL CHARACTERISTICS                                                                     |                                                                                                                                                                                                                                                                                                                                                                                                                                                                                                                                                                                                                                                                                                                                                                               |
| 1. Current status of substance abuse                                                         | <input type="checkbox"/> Intravenous drug use<br><input type="checkbox"/> Non-intravenous drug use<br><input type="checkbox"/> Alcohol abuse<br><input type="checkbox"/> Opioid substitution treatment<br><input type="checkbox"/> Other, specify: _____<br><input type="checkbox"/> Unknown                                                                                                                                                                                                                                                                                                                                                                                                                                                                                  |

|                                                                                                              |                                                                                                                                                                                                                                                                                                                                                                                                                                  |
|--------------------------------------------------------------------------------------------------------------|----------------------------------------------------------------------------------------------------------------------------------------------------------------------------------------------------------------------------------------------------------------------------------------------------------------------------------------------------------------------------------------------------------------------------------|
| 2. Date of diagnosis of HCV infection (year and month)                                                       | _ _ _ _ - _ _ _  (yyyy-mm)<br>[ ] Doesn't know                                                                                                                                                                                                                                                                                                                                                                                   |
| 3. HCV genotype                                                                                              | [ ] 1 [ ] 2<br>[ ] 1a [ ] 3<br>[ ] 1b [ ] 4<br>[ ] Unknown                                                                                                                                                                                                                                                                                                                                                                       |
| 4. HCV viral load (x10 <sup>6</sup> IU/ml)                                                                   | _____<br>[ ] Unknown                                                                                                                                                                                                                                                                                                                                                                                                             |
| 5. HCV Transmission Mode                                                                                     | [ ] Intravenous drug use<br>[ ] Post-transfusion<br>[ ] Peri-natal<br>[ ] Sexual<br>[ ] Other, specify: _____<br>[ ] Doesn't know                                                                                                                                                                                                                                                                                                |
| 6. Comorbidities                                                                                             |                                                                                                                                                                                                                                                                                                                                                                                                                                  |
| 6.1. HIV                                                                                                     | [ ] Yes [ ] No [ ] Doesn't know                                                                                                                                                                                                                                                                                                                                                                                                  |
| 6.2. HBV                                                                                                     | [ ] Yes [ ] No [ ] Doesn't know                                                                                                                                                                                                                                                                                                                                                                                                  |
| 6.3. Mental disorders                                                                                        | [ ] Yes [ ] No [ ] Doesn't know                                                                                                                                                                                                                                                                                                                                                                                                  |
| 6.3.1. (if yes) Specify (considering ICD-10)                                                                 | _____                                                                                                                                                                                                                                                                                                                                                                                                                            |
| 6.4. Other comorbidities                                                                                     | [ ] Yes [ ] No [ ] Doesn't know                                                                                                                                                                                                                                                                                                                                                                                                  |
| 6.4.1. (if yes) Specify                                                                                      | _____                                                                                                                                                                                                                                                                                                                                                                                                                            |
| <b>HEPATITIS C TREATMENT</b>                                                                                 |                                                                                                                                                                                                                                                                                                                                                                                                                                  |
| 1. Patient was previous referred to treatment?                                                               | [ ] Yes [ ] No [ ] Doesn't know                                                                                                                                                                                                                                                                                                                                                                                                  |
| 2. Patient received previous treatment?                                                                      | [ ] Yes [ ] No [ ] Doesn't know                                                                                                                                                                                                                                                                                                                                                                                                  |
| 3. Patient is currently referred to a hospital clinic?                                                       | [ ] Yes [ ] No [ ] Doesn't know                                                                                                                                                                                                                                                                                                                                                                                                  |
| 3.1. (if yes) Which hospital?                                                                                | _____                                                                                                                                                                                                                                                                                                                                                                                                                            |
| 3.1.1. This current referral has resulted in a medical appointment with a liver specialist at that hospital? | [ ] Yes [ ] No [ ] Doesn't know                                                                                                                                                                                                                                                                                                                                                                                                  |
| 3.2. (if no) Patient was referred to a hospital clinic during this evaluation?                               | [ ] Yes [ ] No [ ] Doesn't know                                                                                                                                                                                                                                                                                                                                                                                                  |
| 3.2.1 (if yes) Which hospital?                                                                               | _____                                                                                                                                                                                                                                                                                                                                                                                                                            |
| 4. Did the liver specialist (at the hospital) prescribed the patient with HCV treatment?                     | [ ] Yes [ ] No [ ] Doesn't know                                                                                                                                                                                                                                                                                                                                                                                                  |
| 4.1. (if yes) What is the current treatment status?                                                          | [ ] Patient has not initiated treatment<br>[ ] Initiated and is still under treatment<br>[ ] Initiated and stopped treatment due to unknown reason<br>[ ] Initiated and stopped treatment due to lack of effectiveness<br>[ ] Initiated and stopped treatment due to adverse events<br>[ ] Initiated and stopped treatment due to lack of persistence<br>[ ] Initiated and completed treatment as prescribed<br>[ ] Doesn't know |
| 5. How many medical appointments at the hospital did the patient attended, in the last 6 months?             | _____                                                                                                                                                                                                                                                                                                                                                                                                                            |
| 6. Number of visits at the STDC in the last 6 months?                                                        | _____                                                                                                                                                                                                                                                                                                                                                                                                                            |

| PATIENT KNOWLEDGE ABOUT HEPATITIS C                                                                                                                                                                                                                                                                                       |                                                                                                                                                                                                                                                                                                                                                                                                                                            |
|---------------------------------------------------------------------------------------------------------------------------------------------------------------------------------------------------------------------------------------------------------------------------------------------------------------------------|--------------------------------------------------------------------------------------------------------------------------------------------------------------------------------------------------------------------------------------------------------------------------------------------------------------------------------------------------------------------------------------------------------------------------------------------|
| 1. How does the Hepatitis C infection evolves?<br>1.1. Patient shows symptoms immediately after infection with HCV?<br>1.2. If left untreated, the majority of cases progress to cirrhosis?<br>1.3. Co-infection with HIV may increase disease progression?<br>1.4. Alcohol consumption may increase disease progression? | <br><input type="checkbox"/> Yes <input type="checkbox"/> No <input type="checkbox"/> Doesn't know<br><input type="checkbox"/> Yes <input type="checkbox"/> No <input type="checkbox"/> Doesn't know<br><input type="checkbox"/> Yes <input type="checkbox"/> No <input type="checkbox"/> Doesn't know<br><input type="checkbox"/> Yes <input type="checkbox"/> No <input type="checkbox"/> Doesn't know                                   |
| 2. What is Hepatitis C disease?                                                                                                                                                                                                                                                                                           | <input type="checkbox"/> Is a liver viral disease<br><input type="checkbox"/> Is a disease that affects whole body organs<br><input type="checkbox"/> Doesn't know                                                                                                                                                                                                                                                                         |
| 3. How is Hepatitis C transmitted?                                                                                                                                                                                                                                                                                        | <input type="checkbox"/> Sexual transmission only<br><input type="checkbox"/> Sexual and blood transmission<br><input type="checkbox"/> Physical contact<br><input type="checkbox"/> Sharing of materials related with drug use<br><input type="checkbox"/> Doesn't know<br><input type="checkbox"/> Other, specify: _____                                                                                                                 |
| 4. What are the symptoms of Hepatitis C?                                                                                                                                                                                                                                                                                  | <input type="checkbox"/> Generalized weakness<br><input type="checkbox"/> Weight loss<br><input type="checkbox"/> Vomits and diarrhea<br><input type="checkbox"/> All the previous<br><input type="checkbox"/> There are no symptoms<br><input type="checkbox"/> Doesn't know                                                                                                                                                              |
| 5. Hepatitis C is curable?                                                                                                                                                                                                                                                                                                | <input type="checkbox"/> Yes <input type="checkbox"/> No <input type="checkbox"/> Doesn't know                                                                                                                                                                                                                                                                                                                                             |
| 6. Which diseases are most associated with Hepatitis C?                                                                                                                                                                                                                                                                   | <input type="checkbox"/> HIV<br><input type="checkbox"/> Hepatitis B<br><input type="checkbox"/> Tuberculosis<br><input type="checkbox"/> All the previous<br><input type="checkbox"/> Doesn't know                                                                                                                                                                                                                                        |
| 7. What are the treatment options for Hepatitis C?                                                                                                                                                                                                                                                                        | <input type="checkbox"/> Treatment that should be used over the lifetime<br><input type="checkbox"/> Treatment that should be used during a limited period<br><input type="checkbox"/> There is no treatment<br><input type="checkbox"/> Doesn't know                                                                                                                                                                                      |
| 8. What are the possible treatment outcomes?                                                                                                                                                                                                                                                                              | <input type="checkbox"/> Most patients develop liver cirrhosis<br><input type="checkbox"/> Most patients become cured<br><input type="checkbox"/> Doesn't know                                                                                                                                                                                                                                                                             |
| 9. What are main adverse reactions to Hepatitis C treatment?                                                                                                                                                                                                                                                              | <input type="checkbox"/> Flu-like symptoms<br><input type="checkbox"/> Fatigue<br><input type="checkbox"/> Depression<br><input type="checkbox"/> Appetite loss<br><input type="checkbox"/> Nausea, vomits and diarrhea<br><input type="checkbox"/> Skin reactions<br><input type="checkbox"/> Weight loss<br><input type="checkbox"/> Alopecia<br><input type="checkbox"/> Doesn't know<br><input type="checkbox"/> Other, specify: _____ |
| 10. Do adverse reactions disappear after treatment discontinuation?                                                                                                                                                                                                                                                       | <input type="checkbox"/> Yes <input type="checkbox"/> No <input type="checkbox"/> Doesn't know                                                                                                                                                                                                                                                                                                                                             |
